# Supplementary material
Source: publisher site journal article supplement (https://www.spandidos-publications.com/8426/downloadSupplementary)
Supplement: Supplementary file 1 [file downloadSupplementary]

Figure S1. Morphological features of the plant material (leaf, stem and bud) used for TfELN preparation. (A) Leaves and flower buds attached to stems. (B) Magnified view of the bud area in panel A. (C) Close-up of a stem. (D) Close-up of a flower bud. (E) Close-up of a leaf (adaxial surface). (F) Close-up of a leaf (abaxial surface). TfELN, *Talinum fruticosum*-derived exosome-like nanoparticle.

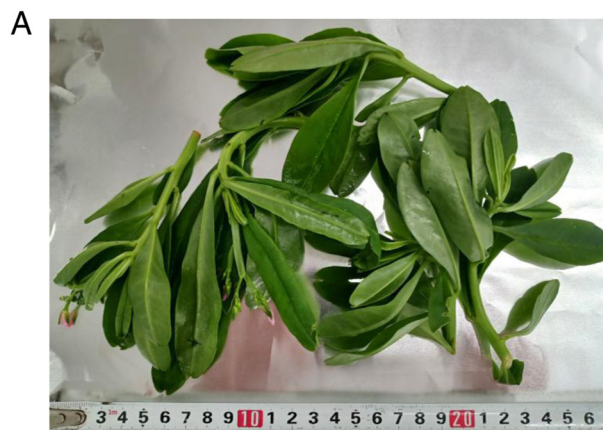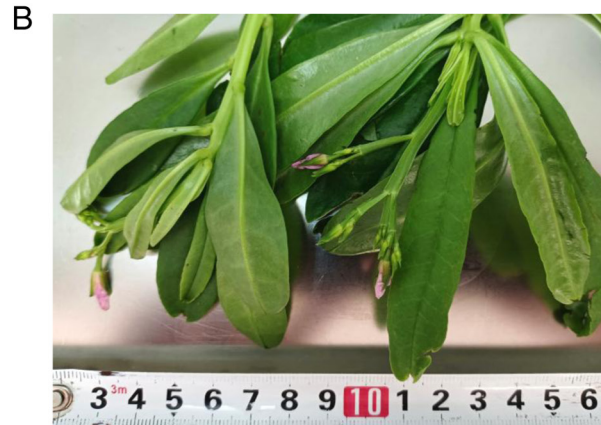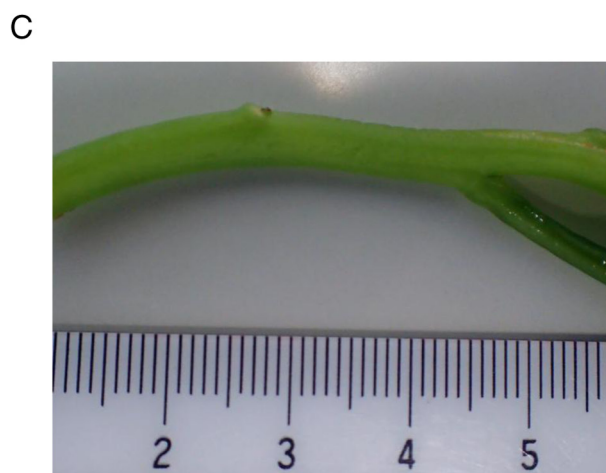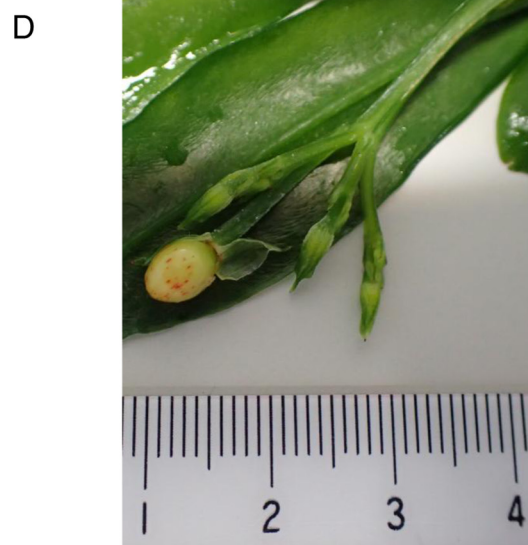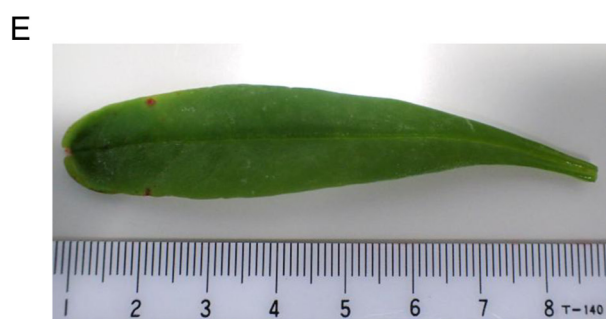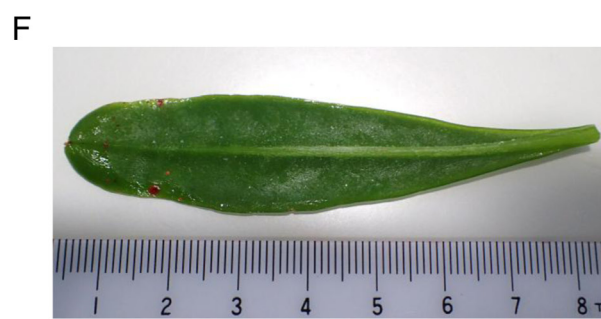

Figure S2. Morphological features of the plant material (flower) used for TfELN preparation. (A) A nearly blooming flower. White arrowheads indicate the characteristic longitudinal ridges of the rachis. (B) Close-up of a nearly blooming flower with separated sepals. (C) Close-up of the inner structure of a nearly blooming flower. TfELN, *Talinum fruticosum*-derived exosome-like nanoparticle.

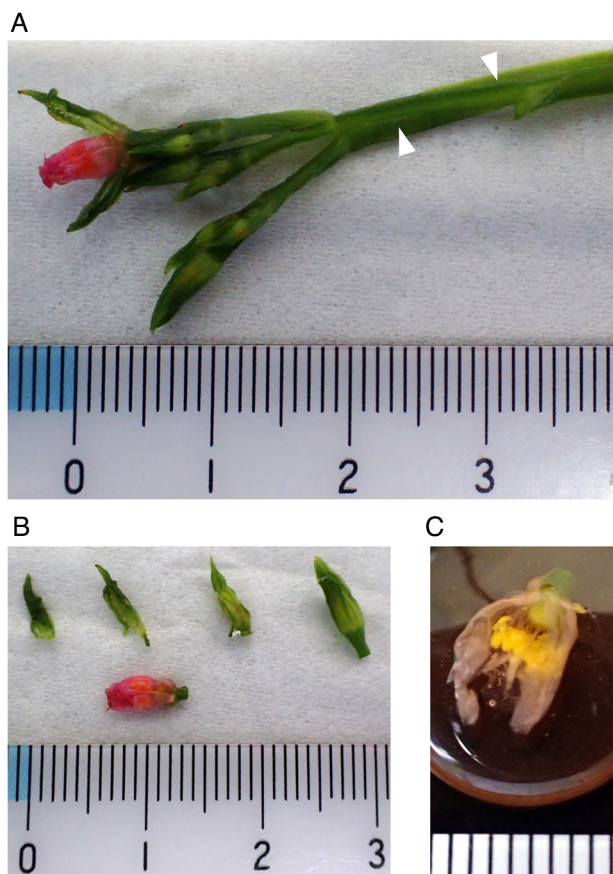

Figure S3. DNA barcoding of the *rbcL* locus (553 bp). (A) Screenshot of the top 10 BLASTN hits (Descriptions table) for the *rbcL* sequence, shown in the default BLASTN order (sorted by E-value) against the NCBI nucleotide database. (B) Screenshot of a representative pairwise alignment between the query *rbcL* sequence and a reference *Talinum fruticosum* sequence (top *T. fruticosum* hit), illustrating the sequence similarity across the aligned region. Note: The *rbcL* barcode region can be highly conserved among closely related *Talinum* species; therefore, *rbcL* barcoding is presented as supportive molecular evidence together with the *matK* results (Fig. S4) and diagnostic morphological characteristics (Figs. S1 and S2) for species identification. *rbcL*, ribulose-1,5-bisphosphate carboxylase/oxygenase large subunit gene; bp, base pairs; BLASTN, Basic Local Alignment Search Tool for nucleotides; NCBI, National Center for Biotechnology Information; *matK*, maturase K gene.

**A**

| Descriptions                                                                                                                                               |                                     | Graphic Summary | Alignments  | Taxonomy    |         |            |          |                             |
|------------------------------------------------------------------------------------------------------------------------------------------------------------|-------------------------------------|-----------------|-------------|-------------|---------|------------|----------|-----------------------------|
| <b>Sequences producing significant alignments</b>                                                                                                          |                                     |                 |             |             |         |            |          |                             |
| Download Select columns Show 10                                                                                                                            |                                     |                 |             |             |         |            |          |                             |
| select all 10 sequences selected                                                                                                                           |                                     |                 |             |             |         |            |          |                             |
| GenBank Graphics Distance tree of results MSA Viewer                                                                                                       |                                     |                 |             |             |         |            |          |                             |
| Description                                                                                                                                                | Scientific Name                     | Max Score       | Total Score | Query Cover | E value | Per. Ident | Acc. Len | Accession                   |
| <input checked="" type="checkbox"/> <a href="#">Talinum fruticosum chloroplast, complete genome</a>                                                        | <a href="#">Talinum fruticos...</a> | 1022            | 1022        | 100%        | 0.0     | 100.00%    | 156811   | <a href="#">NC_067064.1</a> |
| <input checked="" type="checkbox"/> <a href="#">Talinum paniculatum chloroplast, complete genome</a>                                                       | <a href="#">Talinum panicul...</a>  | 1022            | 1022        | 100%        | 0.0     | 100.00%    | 156929   | <a href="#">NC_037748.1</a> |
| <input checked="" type="checkbox"/> <a href="#">Talinum fruticosum voucher FR04499535 ribulose-1,5-bisphosphate carboxylase/oxygenase large subunit...</a> | <a href="#">Talinum fruticos...</a> | 1022            | 1022        | 100%        | 0.0     | 100.00%    | 603      | <a href="#">MT385745.1</a>  |
| <input checked="" type="checkbox"/> <a href="#">Talinella dauphinensis plastid</a>                                                                         | <a href="#">Talinella dauphi...</a> | 1005            | 1005        | 99%         | 0.0     | 99.64%     | 158447   | <a href="#">MK397930.1</a>  |
| <input checked="" type="checkbox"/> <a href="#">Talinum paniculatum voucher PS0876MT02 ribulose-1,5-bisphosphate carboxylase/oxygenase large subu...</a>   | <a href="#">Talinum panicul...</a>  | 989             | 989         | 99%         | 0.0     | 99.09%     | 703      | <a href="#">GQ436529.1</a>  |
| <input checked="" type="checkbox"/> <a href="#">Talinum paniculatum voucher RQH00932 ribulose-1,5-bisphosphate carboxylase large subunit (rbcL).ge...</a>  | <a href="#">Talinum panicul...</a>  | 989             | 989         | 99%         | 0.0     | 99.09%     | 717      | <a href="#">MH050074.1</a>  |
| <input checked="" type="checkbox"/> <a href="#">Talinum paniculatum voucher RQH01158 ribulose-1,5-bisphosphate carboxylase large subunit (rbcL).ge...</a>  | <a href="#">Talinum panicul...</a>  | 989             | 989         | 99%         | 0.0     | 99.09%     | 717      | <a href="#">MH050075.1</a>  |
| <input checked="" type="checkbox"/> <a href="#">Talinum paniculatum voucher ZCB0443(KUN) plastid, complete genome</a>                                      | <a href="#">Talinum panicul...</a>  | 989             | 989         | 99%         | 0.0     | 99.09%     | 156888   | <a href="#">MK397900.1</a>  |
| <input checked="" type="checkbox"/> <a href="#">Talinum paniculatum voucher 14CS9067 (KUN) plastid, complete genome</a>                                    | <a href="#">Talinum panicul...</a>  | 989             | 989         | 99%         | 0.0     | 99.09%     | 156888   | <a href="#">MK397901.1</a>  |
| <input checked="" type="checkbox"/> <a href="#">Talinum paniculatum voucher RQH00823 ribulose-1,5-bisphosphate carboxylase large subunit (rbcL).ge...</a>  | <a href="#">Talinum panicul...</a>  | 983             | 983         | 99%         | 0.0     | 98.91%     | 717      | <a href="#">MH050076.1</a>  |

**B**

Query: rbcL, rbcLa-F/rbcLa-R, 553-bp  
 Subject: Talinum fruticosum chloroplast, complete genome (NC\_067064.1)

| Score          | Expect                                                       | Identities    | Gaps      | Strand    |
|----------------|--------------------------------------------------------------|---------------|-----------|-----------|
| 1022 bits(553) | 0.0                                                          | 553/553(100%) | 0/553(0%) | Plus/Plus |
| Query 1        | TTTTGTTGGATTTAAAGCAGGTGTTAAAGATTACAAATTGACTTATTATACTCCTCAATA |               |           | 60        |
| Sbjct 56992    | TTTTGTTGGATTTAAAGCAGGTGTTAAAGATTACAAATTGACTTATTATACTCCTCAATA |               |           | 57051     |
| Query 61       | TCAACCCCTGGACTGATATCTTGGCAGCATTCCGAGTAACCTCAACCTGGAGTTCC     |               |           | 120       |
| Sbjct 57052    | TCAACCCCTGGACTGATATCTTGGCAGCATTCCGAGTAACCTCAACCTGGAGTTCC     |               |           | 57111     |
| Query 121      | GTCAGAAGAAGCAGGAGCTGCAGTAGCTGCCGAATCTTCTACTGGTACATGGACAACGT  |               |           | 180       |
| Sbjct 57112    | GTCAGAAGAAGCAGGAGCTGCAGTAGCTGCCGAATCTTCTACTGGTACATGGACAACGT  |               |           | 57171     |
| Query 181      | ATGGACCGACGGACTACCAGTCTTGATCGTTACAAAGGGCGATGCTACCACATTGATGC  |               |           | 240       |
| Sbjct 57172    | ATGGACCGACGGACTACCAGTCTTGATCGTTACAAAGGGCGATGCTACCACATTGATGC  |               |           | 57231     |
| Query 241      | CGTTCCTGGAGAAGACAATCAATATATTTGTTATGTAGCTTACCCCTTAGACCTTTTGA  |               |           | 300       |
| Sbjct 57232    | CGTTCCTGGAGAAGACAATCAATATATTTGTTATGTAGCTTACCCCTTAGACCTTTTGA  |               |           | 57291     |
| Query 301      | AGAAGGTTCTGTTACTAATATGTTTACTTCCATTGGGTAATGTATTTGGGTTCAAAGC   |               |           | 360       |
| Sbjct 57292    | AGAAGGTTCTGTTACTAATATGTTTACTTCCATTGGGTAATGTATTTGGGTTCAAAGC   |               |           | 57351     |
| Query 361      | CCTTCGTGCTCTACGTTTGGAGGATTTGCGAATCCCTGTTGCTTATATCAAAACTTTCCA |               |           | 420       |
| Sbjct 57352    | CCTTCGTGCTCTACGTTTGGAGGATTTGCGAATCCCTGTTGCTTATATCAAAACTTTCCA |               |           | 57411     |
| Query 421      | AGGCCCGCTCACGGTATCCAGGTTGAGAGAGATAAATTGAACAAGTATGGCCGCTCTCT  |               |           | 480       |
| Sbjct 57412    | AGGCCCGCTCACGGTATCCAGGTTGAGAGAGATAAATTGAACAAGTATGGCCGCTCTCT  |               |           | 57471     |
| Query 481      | ATTGGGATGCACTATTAAGCCGAAATGGGGTTATCTGCTAAAAACTATGGTCGAGCAGT  |               |           | 540       |
| Sbjct 57472    | ATTGGGATGCACTATTAAGCCGAAATGGGGTTATCTGCTAAAAACTATGGTCGAGCAGT  |               |           | 57531     |
| Query 541      | TTATGAATGTCTT                                                | 553           |           |           |
| Sbjct 57532    | TTATGAATGTCTT                                                | 57544         |           |           |

Figure S4. DNA barcoding of the *matK* locus (852 bp). (A) Screenshot of the top 10 BLASTN hits (Descriptions table) for the *matK* sequence, shown in the default BLASTN order (sorted by E-value) against the NCBI nucleotide database. (B) Screenshot of a representative pairwise alignment between the query *matK* sequence and a reference *Talinum fruticosum* sequence (top *T. fruticosum* hit), illustrating the sequence similarity across the aligned region. Note: A hit showing 100% identity with 94% query coverage reflects complete identity within the aligned region, with the remaining region not covered by the query sequence (i.e., no overlapping bases available for comparison). Species identification was determined based on the combined evidence from DNA barcoding (Figs. S3 and S4) and morphological characteristics (Figs. S1 and S2). *matK*, maturase K gene; bp, base pairs; BLASTN, Basic Local Alignment Search Tool for nucleotides; NCBI, National Center for Biotechnology Information.

**A**

| Descriptions                                                                                                                                                 |                                     | Graphic Summary | Alignments  | Taxonomy                 |         |            |          |                             |
|--------------------------------------------------------------------------------------------------------------------------------------------------------------|-------------------------------------|-----------------|-------------|--------------------------|---------|------------|----------|-----------------------------|
| <b>Sequences producing significant alignments</b>                                                                                                            |                                     |                 |             |                          |         |            |          |                             |
| Download                                                                                                                                                     |                                     | Select columns  | Show        | 10                       |         |            |          |                             |
| select all 10 sequences selected                                                                                                                             |                                     | GenBank         | Graphics    | Distance tree of results |         |            |          |                             |
| MSA Viewer                                                                                                                                                   |                                     |                 |             |                          |         |            |          |                             |
| Description                                                                                                                                                  | Scientific Name                     | Max Score       | Total Score | Query Cover              | E value | Per. Ident | Acc. Len | Accession                   |
| <input checked="" type="checkbox"/> <a href="#">Talinum paniculatum chloroplast, complete genome</a>                                                         | <a href="#">Talinum panicul...</a>  | 1574            | 1574        | 100%                     | 0.0     | 100.00%    | 156929   | <a href="#">NC_037748.1</a> |
| <input checked="" type="checkbox"/> <a href="#">Talinum fruticosum voucher Flora K. Samis 8 maturase K (matK) gene, partial cds; chloroplast</a>             | <a href="#">Talinum fruticos...</a> | 1570            | 1570        | 100%                     | 0.0     | 100.00%    | 924      | <a href="#">KY952518.1</a>  |
| <input checked="" type="checkbox"/> <a href="#">Talinum fruticosum chloroplast, complete genome</a>                                                          | <a href="#">Talinum fruticos...</a> | 1563            | 1563        | 100%                     | 0.0     | 99.77%     | 156811   | <a href="#">NC_067064.1</a> |
| <input checked="" type="checkbox"/> <a href="#">Talinum fruticosum maturase K (matK) gene, complete cds; chloroplast</a>                                     | <a href="#">Talinum fruticos...</a> | 1552            | 1552        | 100%                     | 0.0     | 99.53%     | 1530     | <a href="#">DQ855844.1</a>  |
| <input checked="" type="checkbox"/> <a href="#">Talinella dauphinensis plastid</a>                                                                           | <a href="#">Talinella dauphi...</a> | 1485            | 1485        | 100%                     | 0.0     | 98.12%     | 158447   | <a href="#">MK397930.1</a>  |
| <input checked="" type="checkbox"/> <a href="#">Talinella pachypoda maturase K (matK) gene, complete cds; chloroplast</a>                                    | <a href="#">Talinella pachyp...</a> | 1485            | 1485        | 100%                     | 0.0     | 98.12%     | 1530     | <a href="#">DQ855846.1</a>  |
| <input checked="" type="checkbox"/> <a href="#">Talinum fruticosum voucher LCH42 maturase K (matK) gene, partial cds; chloroplast</a>                        | <a href="#">Talinum fruticos...</a> | 1483            | 1483        | 94%                      | 0.0     | 100.00%    | 858      | <a href="#">KJ380907.1</a>  |
| <input checked="" type="checkbox"/> <a href="#">Talinella sp. AC45-1 tRNA-Lys (trnK) gene, intron; and maturase K (matK) gene, complete cds; chloroplast</a> | <a href="#">Talinella sp. AC...</a> | 1476            | 1476        | 100%                     | 0.0     | 97.89%     | 2457     | <a href="#">AY514859.1</a>  |
| <input checked="" type="checkbox"/> <a href="#">Talinum paniculatum tRNA-Lys (trnK) gene, partial sequence; and maturase K (matK) gene, complete cds;...</a> | <a href="#">Talinum panicul...</a>  | 1458            | 1458        | 100%                     | 0.0     | 97.54%     | 2474     | <a href="#">AY015274.1</a>  |
| <input checked="" type="checkbox"/> <a href="#">Talinum paniculatum voucher Michael J. Moore 1789 (QC) maturase K (matK) gene, partial cds; chloroplast</a>  | <a href="#">Talinum panicul...</a>  | 1458            | 1458        | 100%                     | 0.0     | 97.54%     | 925      | <a href="#">KY952520.1</a>  |

**B** Query: matK, 390F/1326R,852-bp  
 Subject: Talinum fruticosum voucher Flora K. Samis 8 maturase K (matK) gene, partial cds; chloroplast (KY952518.1)

| Score          | Expect                                                        | Identities    | Gaps      | Strand     |
|----------------|---------------------------------------------------------------|---------------|-----------|------------|
| 1570 bits(850) | 0.0                                                           | 850/850(100%) | 0/850(0%) | Plus/Minus |
| Query 3        | CTTTTTCTTGAAGGCCACTATAATAATGAGAAAGATTTCTGCATATACGCCAAACCG     |               |           | 62         |
| Sbjct 924      | CTTTTTCTTGAAGGCCACTATAATAATGAGAAAGATTTCTGCATATACGCCAAACCG     |               |           | 865        |
| Query 63       | ATCAAGAATATCCGAATCTAATAAATCTGTCCAGACCGACTTACTAATGGGATGCTCTAA  |               |           | 122        |
| Sbjct 864      | ATCAAGAATATCCGAATCTAATAAATCTGTCCAGACCGACTTACTAATGGGATGCTCTAA  |               |           | 805        |
| Query 123      | TACGTTACAAAATTCGCTTTAGCCAACGACCAACAGAGGAATAATCGAACTATGGT      |               |           | 182        |
| Sbjct 804      | TACGTTACAAAATTCGCTTTAGCCAACGACCAACAGAGGAATAATCGAACTATGGT      |               |           | 745        |
| Query 183      | ATCGAATTTCTTAATAGTATTATCTATTAGATATGAATTTTCTACCATTGACTCCGTAC   |               |           | 242        |
| Sbjct 744      | ATCGAATTTCTTAATAGTATTATCTATTAGATATGAATTTTCTACCATTGACTCCGTAC   |               |           | 685        |
| Query 243      | CACTGAAGAATTGAGTCGAACACTTgaaaaaaaaCCCCATAAAATCGAGGGAATGTTTTGA |               |           | 302        |
| Sbjct 684      | CACTGAAGAATTGAGTCGAACACTTgaaaaaaaaCCCCATAAAATCGAGGGAATGTTTTGA |               |           | 625        |
| Query 303      | TAATAGATTGATATCGATTCTTCTGGTTGAGACCACAGGGAATAATGACATTGCCAAA    |               |           | 362        |
| Sbjct 624      | TAATAGATTGATATCGATTCTTCTGGTTGAGACCACAGGGAATAATGACATTGCCAAA    |               |           | 565        |
| Query 363      | ATTTATAAGATAAATTTCCATTTATGCATCAGAAGAAATGCCCTTTTGAAGCCAGAAT    |               |           | 422        |
| Sbjct 564      | ATTTATAAGATAAATTTCCATTTATGCATCAGAAGAAATGCCCTTTTGAAGCCAGAAT    |               |           | 505        |
| Query 423      | TGATTTTCTCGATACCTAACATAATGTGGAAAGGGCTTTGAAAAGCCATAAGATAAC     |               |           | 482        |
| Sbjct 504      | TGATTTTCTCGATACCTAACATAATGTGGAAAGGGCTTTGAAAAGCCATAAGATAAC     |               |           | 445        |
| Query 483      | GCGAAAATCCTTAGTAAAAGTTTGACTTTTACTAGATATTCTAGTTTCCGTA AAAATA   |               |           | 542        |
| Sbjct 444      | GCGAAAATCCTTAGTAAAAGTTTGACTTTTACTAGATATTCTAGTTTCCGTA AAAATA   |               |           | 385        |
| Query 543      | GATTCGTTCAAGAAGGGTCCAAAAGATGTTGATCGTAAATGAGAGGATTGGTTACAGAG   |               |           | 602        |
| Sbjct 384      | GATTCGTTCAAGAAGGGTCCAAAAGATGTTGATCGTAAATGAGAGGATTGGTTACAGAG   |               |           | 325        |
| Query 603      | AAAAACGAAAATGGATTGATTACATACATGGAAATATATAGGAACAGGAATAATCG      |               |           | 662        |
| Sbjct 324      | AAAAACGAAAATGGATTGATTACATACATGGAAATATATAGGAACAGGAATAATCG      |               |           | 265        |
| Query 663      | TTGATTCCTTTTGA AAAATAGAAATGGATTTTGGGGAGTAATAAGACTATTCCAATT    |               |           | 722        |
| Sbjct 264      | TTGATTCCTTTTGA AAAATAGAAATGGATTTTGGGGAGTAATAAGACTATTCCAATT    |               |           | 205        |
| Query 723      | ACGATACTATAAAGAAAGATCGTAATAAATGCAAAAGAAACATCTTTCACCCAATA      |               |           | 782        |
| Sbjct 204      | ACGATACTATAAAGAAAGATCGTAATAAATGCAAAAGAAACATCTTTCACCCAATA      |               |           | 145        |
| Query 783      | ACGAAGATTTGAACCAAGATTCGAGATGGATAGGGTAAGGTATTAATTTCTAACAC      |               |           | 842        |
| Sbjct 144      | ACGAAGATTTGAACCAAGATTCGAGATGGATAGGGTAAGGTATTAATTTCTAACAC      |               |           | 85         |
| Query 843      | ATAATTTAAA 852                                                |               |           |            |
| Sbjct 84       | ATAATTTAAA 75                                                 |               |           |            |
